# Supplementary material for: SnO2 nanorods based sensing material as an isopropanol vapor sensor
Source: Royal Society of Chemistry journal article supplement (doi:10.1039/c3nj01482g), 2014-01-01
Supplement: c3nj01482g1.pdf [file c3nj01482g1.pdf]

## Supporting Information

### **SnO<sub>2</sub> nanorods based sensing material as an isopropanol vapor sensor**

Dan Hu <sup>a</sup>, Bingqian Han <sup>a</sup>, Rong Han <sup>a</sup>, Shaojuan Deng <sup>a</sup>, Yan Wang <sup>a</sup>, Qing Li <sup>a</sup>, Yude Wang <sup>a,b,\*</sup>

*a Department of Materials Science and Engineering, Yunnan University 650091, Kunming, People's Republic of China*

*b State Key Lab of Silicon Materials, Zhejiang University, Hangzhou 310027, People's Republic of China*

\* To whom all correspondence should be addressed.

Department of Materials Science and Engineering

Yunnan University, 650091 Kunming (China)

E-mail: [ydwang@ynu.edu.de](mailto:ydwang@ynu.edu.de)

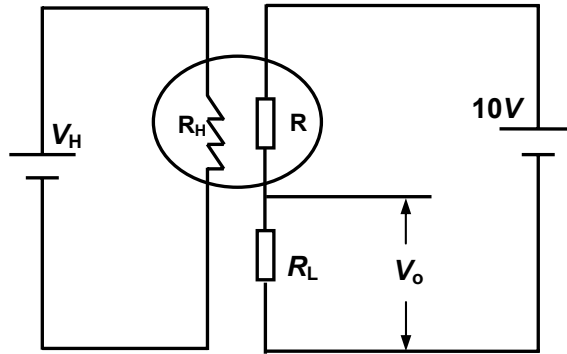

**Scheme S1.** Schematic diagram of testing principle for SnO<sub>2</sub> nanorods gas sensors.  $V_H$  is heating voltage and  $R_H$  is heating resistance.

According to [Scheme S1](#), the electrical resistance of sensor can be obtained as following:

$$R = \frac{10 - V_o}{V_o} \cdot R_L$$

where  $R$  is the resistance of the sensor,  $R_L$  is a constant load resistance unchanged with the surrounding gas partial pressure,  $V_o$  is the sensor export voltage. The gas response  $\beta$  was defined as the ratio of the electrical resistance in air ( $R_o$ ) to that in gases ( $R_g$ ):

$$R_o = \frac{10 - (V_o)_{\text{air}}}{(V_o)_{\text{air}}} \cdot R_L, \quad R_g = \frac{10 - (V_o)_g}{(V_o)_g} \cdot R_L, \quad \beta = \frac{R_o}{R_g}$$

where  $(V_o)_{\text{air}}$  is the export voltage in air, and  $(V_o)_{\text{gas}}$  is in gases.

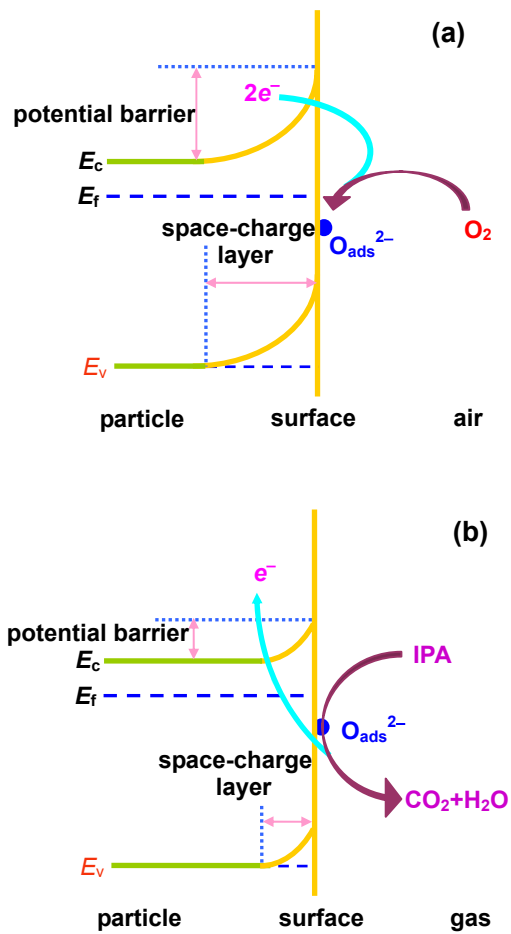

**Scheme S2.** A schematic diagram of the proposed reaction mechanism of porous SnO<sub>2</sub> nanorods based sensor to IPA. (a) in dry air, (b) in IPA.

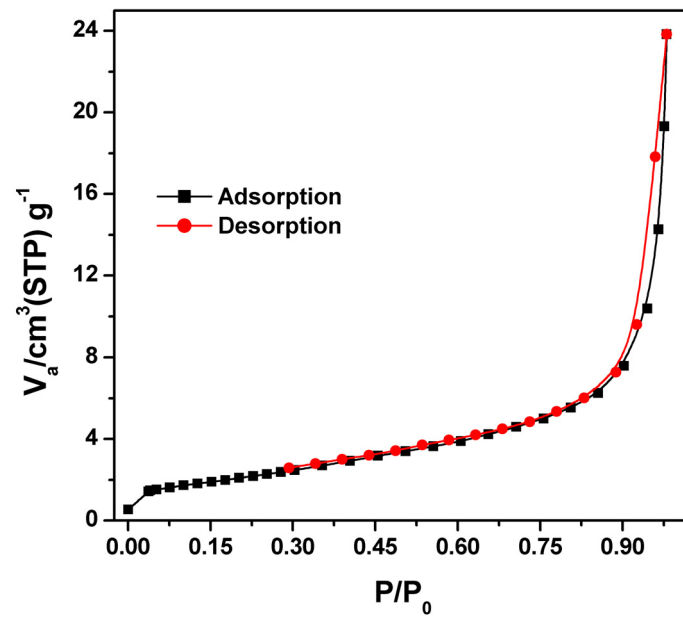

**Figure S1** Nitrogen adsorption/desorption isotherm of SnO<sub>2</sub> nanorods
